# Supplementary material
Source: publisher figshare collection journal article supplement (https://tandf.figshare.com/articles/dataset/_/9947696)

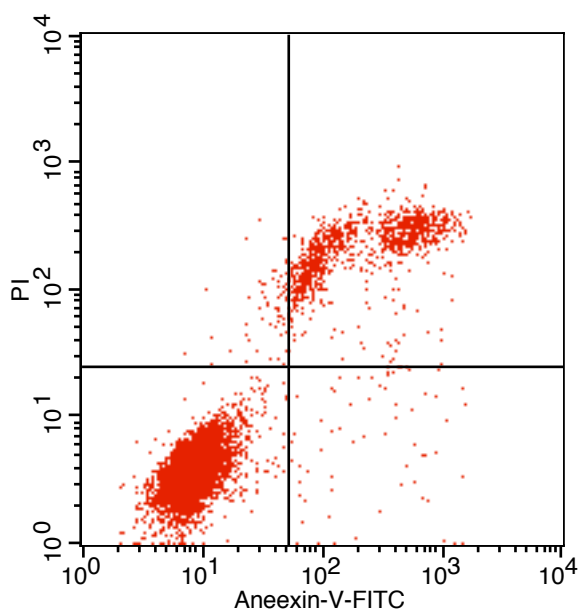

Case Number:  
 Gated Events: 7021  
 X Parameter: Aneexin-V-FITC  
 Quad Location: 52, 24

| Quad | Events | % Gated |
|------|--------|---------|
| UL   | 66     | 0.94    |
| UR   | 1084   | 15.44   |
| LL   | 5810   | 82.75   |
| LR   | 61     | 0.87    |

Supplement: Supplementary file 1 [file 4]

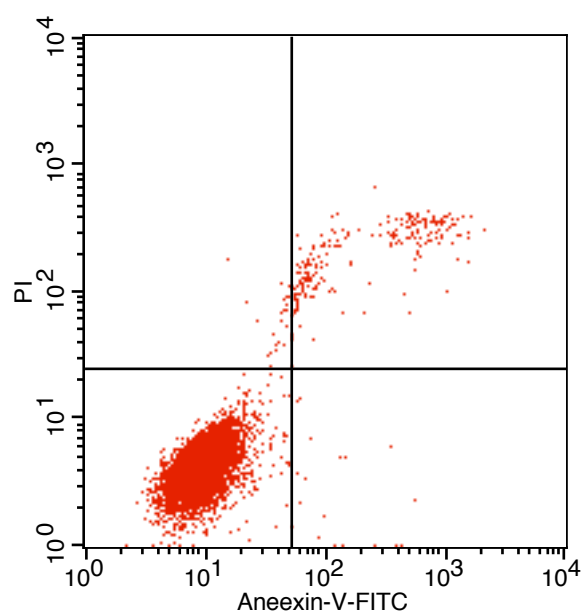

Case Number:  
 Gated Events: 7004  
 X Parameter: Aneexin-V-FITC  
 Quad Location: 52, 24

| Quad | Events | % Gated |
|------|--------|---------|
| UL   | 28     | 0.40    |
| UR   | 223    | 3.18    |
| LL   | 6735   | 96.16   |
| LR   | 18     | 0.26    |

Supplement: Supplementary file 2 [file 4]

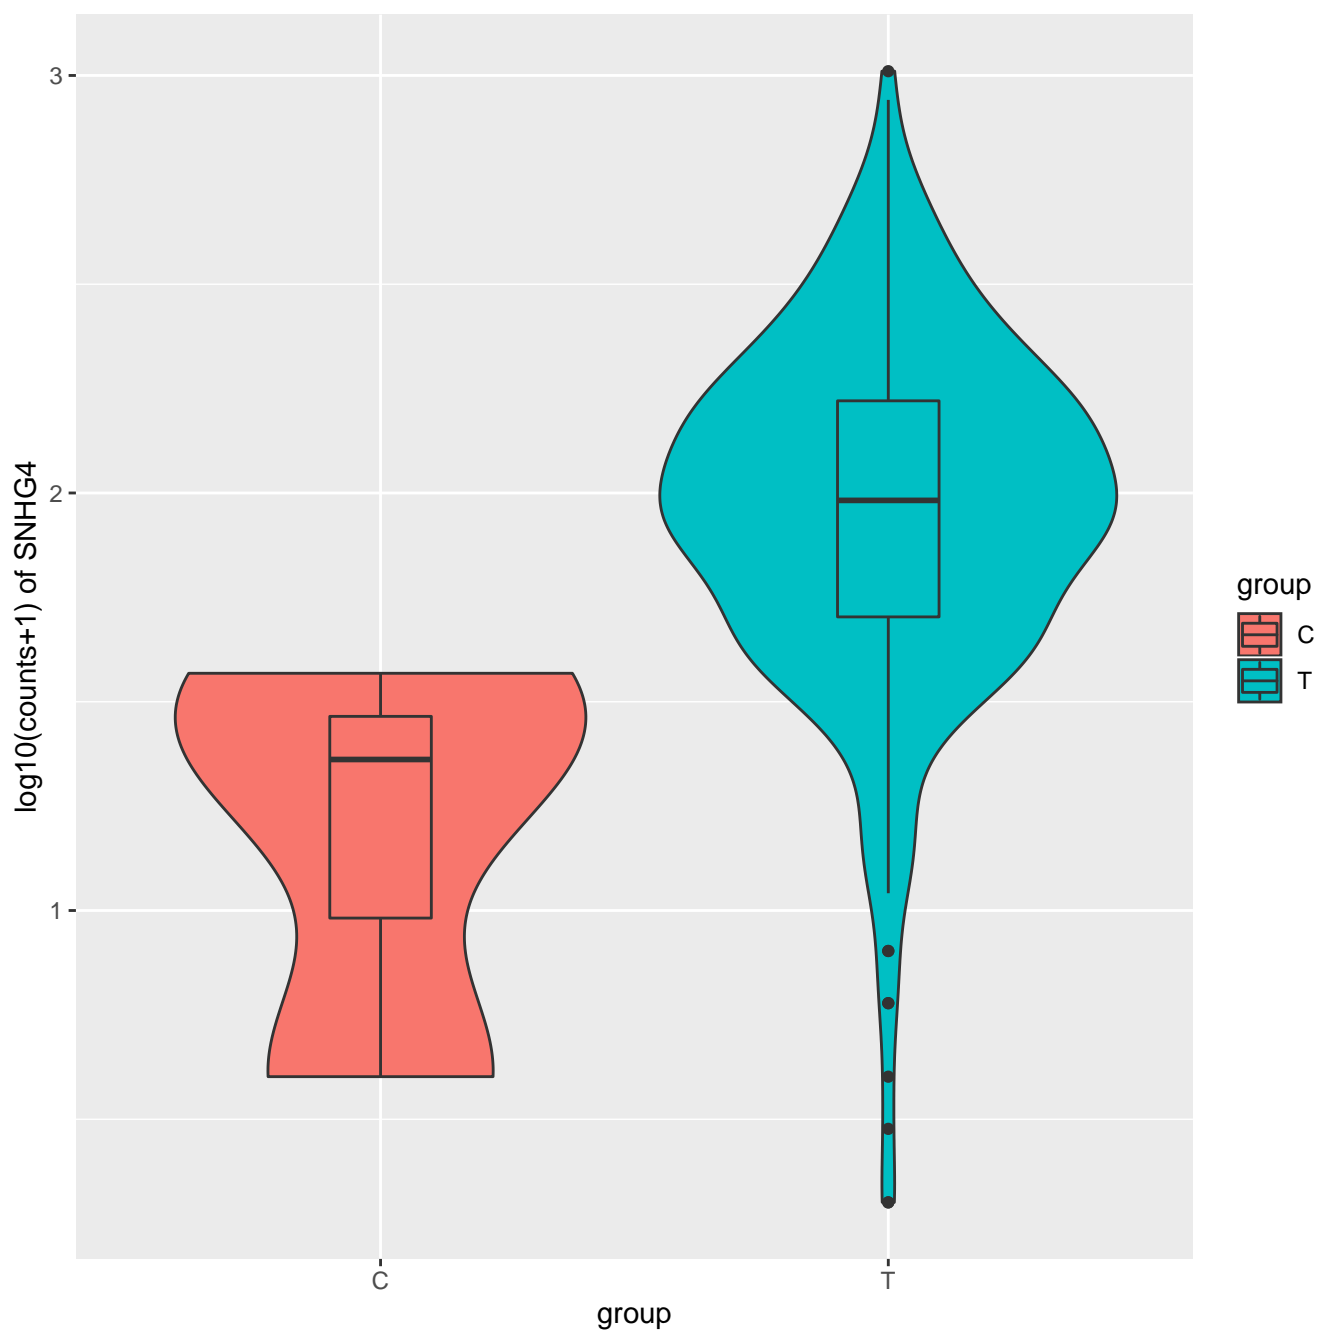

Supplement: Supplementary file 3 [file 4]

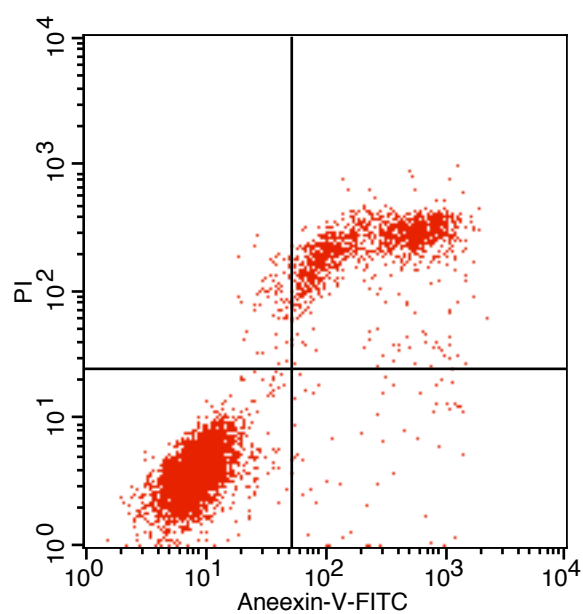

Case Number:

Gated Events: 7018

X Parameter: Aneexin-V-FITC

Quad Location: 52, 24

| Quad | Events | % Gated |
|------|--------|---------|
| UL   | 72     | 1.03    |
| UR   | 1326   | 18.89   |
| LL   | 5566   | 79.31   |
| LR   | 54     | 0.77    |

Supplement: Supplementary file 4 [file 4]

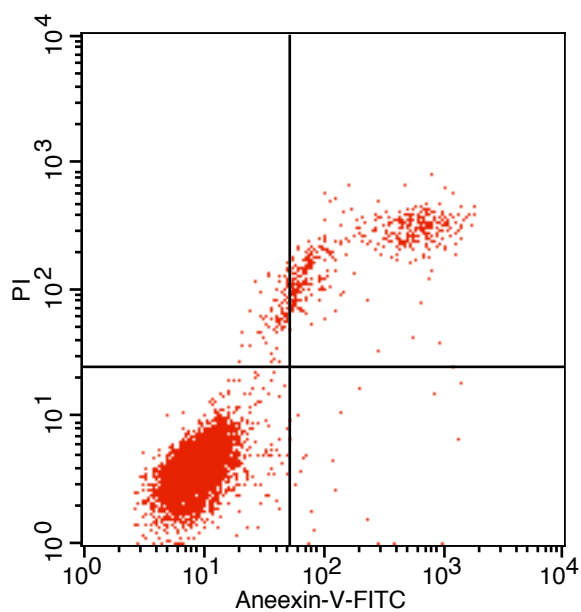

Case Number:  
 Gated Events: 7011  
 X Parameter: Aneexin-V-FITC  
 Quad Location: 52, 24

| Quad | Events | % Gated |
|------|--------|---------|
| UL   | 97     | 1.38    |
| UR   | 438    | 6.25    |
| LL   | 6456   | 92.08   |
| LR   | 20     | 0.29    |

Supplement: Supplementary file 5 [file 4]
